# Supplementary material
Source: MDPI journal article supplement (https://www.mdpi.com/2073-4441/11/1/168)
Supplement: s1 [file s1]

**Table S1.** Days with temperature measurements considered in this study, along with the Landsat 7 ETM+ and MODIS images available for each date.

| Date       | Landsat date | Stations imaged |         |          | MOD28 date  | Stations imaged |         |          | MOD11 date | Stations imaged |         |          |
|------------|--------------|-----------------|---------|----------|-------------|-----------------|---------|----------|------------|-----------------|---------|----------|
|            |              | Southern        | Central | Northern |             | Southern        | Central | Northern |            | Southern        | Central | Northern |
| 2001/08/21 | same date    | X               | X       | X        | same date   | -               | X       | X        | same date  | X               | X       | X        |
| 2001/10/24 | same date    | X               | X       | X        | same date   | X               | X       | X        | same date  | X               | X       | X        |
| 2002/01/29 | 2002/01/28   | X               | X       | X        | same date   | X               | X       | X        | same date  | X               | X       | X        |
| 2002/11/19 | same date    | X               | X       | X        | same date   | -               | X       | -        | same date  | X               | X       | X        |
| 2003/10/21 | same date    | X               | X       | -        | same date   | -               | X       | X        | same date  | -               | X       | X        |
| 2004/02/10 | same date    | X               | X       | -        | same date   | X               | X       | -        | same date  | X               | X       | X        |
| 2005/05/03 | same date    | X               | X       | X        | unavailable | -               | -       | -        | same date  | X               | X       | X        |
| 2008/11/12 | same date    | X               | X       | X        | same date   | X               | X       | X        | same date  | X               | X       | X        |
| 2010/06/11 | same date    | X               | X       | X        | same date   | X               | X       | -        | same date  | X               | X       | X        |
| 2010/07/29 | same date    | X               | X       | X        | unavailable | -               | -       | -        | same date  | X               | X       | X        |
| 2010/11/23 | 2010/11/25   | X               | X       | X        | 2010/11/24  | X               | X       | X        | 2010/11/25 | X               | X       | X        |
| 2011/04/27 | same date    | X               | X       | X        | 2011/04/29  | -               | X       | -        | same date  | X               | X       | X        |
| 2011/07/07 | same date    | X               | X       | X        | same date   | X               | X       | X        | same date  | X               | X       | X        |
| 2011/11/27 | 2011/11/28   | X               | -       | -        | 2011/11/26  | -               | X       | X        | 2011/11/26 | X               | X       | X        |
| 2012/03/28 | same date    | X               | X       | X        | same date   |                 |         |          | 2012/03/27 | -               | X       | -        |
| 2012/04/18 | 2012/04/20   | X               | X       | X        | 2012/04/18  | -               | X       | X        | 2012/04/18 | X               | X       | X        |
| 2012/05/30 | 2012/05/31   | X               | X       | X        | 2012/05/31  | X               | X       | X        | 2012/05/31 | X               | X       | X        |
| 2012/07/24 | 2012/07/25   | X               | X       | X        | 2012/07/22  | -               | X       | -        | 2012/07/25 | X               | X       | X        |
| 2012/09/26 | 2012/09/27   | X               | X       | X        | 2012/09/27  | -               | X       | X        | 2012/09/27 | X               | X       | X        |
| 2013/03/14 | 2013/03/15   | -               | -       | X        | 2013/03/15  | X               | -       | X        | 2013/03/15 | X               | X       | -        |
| 2013/04/16 | same date    | X               | X       | X        | 2013/04/15  | -               | -       | X        | 2013/04/17 | -               | X       | X        |
| 2014/05/27 | 2014/05/28   | X               | X       | X        | 2014/05/28  | X               | X       | -        | 2014/05/28 | X               | X       | -        |
| 2014/11/11 | 2014/11/13   | X               | X       | X        | 2014/11/09  | -               | X       | X        | 2014/11/13 | X               | X       | X        |
| 2015/03/04 | 2015/03/05   | X               | -       | X        | 2015/05/05  | X               | X       | X        | 2015/05/03 | X               | X       | X        |
| 2016/11/10 | unavailable  | -               | -       | -        | 2016/11/11  | X               | X       | X        | 2016/11/11 | X               | X       | X        |
| 2018/05/22 | 2018/05/23   | X               | X       | X        | 2018/05/23  | -               | X       | X        | 2018/05/23 | X               | X       | X        |
